# Supplementary material for: Structural Remodeling of the Human Colonic Mesenchyme in Inflammatory Bowel Disease
Source: PubMed Central journal article supplement (PMC6176871; doi:10.1016/j.cell.2018.08.067), 2018-10-04
Supplement: mmc1.pdf [file mmc1.pdf]

**Cell, Volume 175**

## **Supplemental Information**

### **Structural Remodeling of the Human Colonic**

### **Mesenchyme in Inflammatory Bowel Disease**

**James Kinchen, Hannah H. Chen, Kaushal Parikh, Agne Antanaviciute, Marta Jagielowicz, David Fawcner-Corbett, Neil Ashley, Laura Cubitt, Esther Mellado-Gomez, Moustafa Attar, Eshita Sharma, Quin Wills, Rory Bowden, Felix C. Richter, David Ahern, Kamal D. Puri, Jill Henault, Francois Gervais, Hashem Koohy, and Alison Simmons**

**Table S1: Mesenchymal cells used in scRNA-Seq analyses. Related to Figures 1-4.**

| <b>Sample</b> | <b>Species</b> | <b>Type</b>     | <b>Number of Cells</b> | <b>Technology</b>      | <b>Gender</b> | <b>Age</b>  |
|---------------|----------------|-----------------|------------------------|------------------------|---------------|-------------|
| S1            | Human          | Healthy         | 57                     | C1 Fluidigm/Smart-Seq2 | F             | 69          |
| S2            | Human          | Healthy         | 58                     | C1 Fluidigm/Smart-Seq2 | F             | 57          |
| S3            | Human          | Healthy         | 68                     | C1 Fluidigm/Smart-Seq2 | F             | 50          |
| S4.1          | Human          | UC non-inflamed | 13                     | C1 Fluidigm/Smart-Seq2 | M             | 29          |
| S5.1          | Human          | UC non-inflamed | 31                     | C1 Fluidigm/Smart-Seq2 | M             | 45          |
| S6.1          | Human          | UC non-inflamed | 9                      | C1 Fluidigm/Smart-Seq2 | M             | 30          |
| S4.2          | Human          | UC inflamed     | 24                     | C1 Fluidigm/Smart-Seq2 | M             | 29          |
| S5.2          | Human          | UC inflamed     | 19                     | C1 Fluidigm/Smart-Seq2 | M             | 45          |
| S6.2          | Human          | UC inflamed     | 31                     | C1 Fluidigm/Smart-Seq2 | M             | 30          |
| S7            | Human          | Healthy         | 1919                   | 10x Genomics           | F             | 65          |
| S8            | Human          | Healthy         | 2459                   | 10x Genomics           | M             | 55          |
| S9            | Human          | UC inflamed     | 2097                   | 10x Genomics           | F             | 35          |
| S10           | Human          | UC inflamed     | 2806                   | 10x Genomics           | F             | 44          |
| S11           | Mouse          | Healthy         | 1258                   | 10x Genomics           | M             | 10-12 weeks |
| S12           | Mouse          | Healthy         | 1244                   | 10x Genomics           | M             | 10-12 weeks |
| S13           | Mouse          | Healthy         | 1258                   | 10x Genomics           | M             | 10-12 weeks |
| S14           | Mouse          | DSS             | 1394                   | 10x Genomics           | M             | 10-12 weeks |
| S15           | Mouse          | DSS             | 909                    | 10x Genomics           | M             | 10-12 weeks |
| S16           | Mouse          | DSS             | 1188                   | 10x Genomics           | M             | 10-12 weeks |
